# Supplementary material
Source: publisher site journal article supplement (https://www.spandidos-publications.com/2405/downloadSupplementary)
Supplement: Supplementary file 1 [file downloadSupplementary]

## Sheet: Table SV
Table SV: KEGG analysis of P4HB-related genes
ID	Description	p-value	q-value	geneID	Count
hsa04141	Protein processing in endoplasmic reticulum	1.64e-13	2.11e-11	P4HB/CALR/RPN1/RPN2/SEC61A1/DDOST/PDIA4/MOGS/PREB/PDIA3/SEC13/NPLOC4/MAN1B1/STT3A/DNAJB11/LMAN2/HSPA5/BCAP31/EDEM2	19
hsa00510	N-Glycan biosynthesis	2.8e-06	0.000179795	RPN1/RPN2/DDOST/MOGS/ALG3/MAN1B1/STT3A	7
hsa00513	Various types of N-glycan biosynthesis	8.5e-06	0.0003639	RPN1/RPN2/DDOST/ALG3/MAN1B1/STT3A	6
hsa05110	Vibrio cholerae infection	3.7e-05	0.00118716	SEC61A1/KDELR2/PDIA4/ATP6AP1/ATP6V0B/KDELR1	6
hsa03060	Protein export	0.000181689	0.00466653	SEC61A1/SRP68/HSPA5/SRPRB	4
hsa04142	Lysosome	0.000933739	0.0199853	NEU1/ATP6AP1/ATP6V0B/CTSA/DNASE2/PLA2G15/NAGLU	7
hsa00100	Steroid biosynthesis	0.0019484	0.0357451	NSDHL/EBP/DHCR7	3
